# Supplementary material for: Intrauterine IPEX
Source: Front Pediatr. 2020 Nov 20;8:599283. doi: 10.3389/fped.2020.599283 (PMC7714920; doi:10.3389/fped.2020.599283)
Supplement: Supplementary Table 1 — Main clinical, imaging, and histopathologic features found in 21 individuals from 11 unrelated families with intrauterine IPEX. [file Table_1.XLSX]

## Sheet: Table1_Supplement
Supplemental Table 1 | Main clinical, imaging, and histopathologic features found in 21 individuals from 11 unrelated families with intrauterine IPEX.
Exon	Mutation	Family ID	No. births	Prematurity	Time of survival	No. Male miscarriages	Gestational age (weeks)	Fetal ultrasonography obs.	Presentation at birth	Necropsy findings	DNA sequencing	References
1	c.151C>T	11				2	20	Hydrops			Yes	9
	p.R51X							Echogenic bowel
	Nonsense						21	Hydrops		Hydrops	Yes
								Echogenic bowel		Hypertelorism
										Low set ears
										Severe micrognathia
										Clubfeet
										Clinodactyly
										Thumys hypoplasia
										CD3+ lymphoid cells infiltrate in pancreas, kidney, testis, and adrenal glands
3	c.319_320delTC	2M	2	Yes	51d		31		Untreatable diarrhea			4
	p.S107Nfs*98			Yes	2h		31
	Frameshift					2A	21	Hydrops		CD3+, CD4+, CD8+ infiltrate in pancreatic parenchyma	Yes
							21	Hydrops		CD3+, CD4+, CD8+ infiltrate in pancreatic parenchyma	Yes
6	c.727delG	7	1	Yes	2yB		35	Echogenic bowel	mild skin desquamation		Yes	7
	p.E243Sfs*11							Skin desquamation	IDDMC
	Frameshift							IUGR	DiarrheaC
								Polyhydramnios	Elevated IgEC
7*	c.749delA	6M	1	Yes	SB		27	Hydrops		Exfoliative erythroderma	Yes	7
	p.K250Rfs*4							Echogenic bowel		Clinodactyly
	Frameshift							Skin desquamation
8	c.906delT	10M				1	18	Hydrops		Erythroderma/atopic dermatitis	Yes	8
	p.D303fs*87									Diffuse T cell infiltration in kidney
	Frameshift
9	c.1009 C>T	4				3	18	Hydrops				10
	p.R337X						20	Hydrops		CD3 + CD4+ cells infiltrate within the kidneys and liver	Yes
	Nonsense						18	Hydrops
								Akinesia		CD3+ cells infiltrate the pancreas, myocardium, portal tracts, esophagus, and choroid plexus	Yes
		5M				2	18	Hydrops				6
							22	Hydrops		Hydrops	Yes
								Echogenic kidney		Clubfeet
								Clubfeet
9	c.1033C>T	3				3	24	Hydrops		Erythroderma		11
	p.L345F							Echogenic bowel		Polymorphous inflammatory infiltrates in the pancreas, digestive tract, liver, kidneys, skin, and bronchi
	Missense							IUGR
							NA			Plurivisceral polymorphous inflammatory infiltrates	Yes
							NA			Plurivisceral polymorphous inflammatory infiltrates	Yes
10*	c.1087A>G	8	1	No	29h		39	Polyhydramnios		Prominent lymphocytic infiltrates in the pancreas, gastric mucosa, and thyroid glands	Yes	15
	p.I363V							Hyperechoic skin		Pulmonary hypoplasia
	Missense
11	c.1189C>T	1M	1	Yes	8m		36	IUGR	IDDM		Yes	4
	p.R397W								Diarrhea
	Missense								Pruritic desquamating dermatitis
						1	27	Hydrops
		9	1	Yes	19d		33			Lymphocyte-rich mononuclear infiltrates in the pancreas	Yes	15
*mutation also identified in child or adult with IPEX; MMultigenerational male miscarriages; Amonochorionic twins; Bthe patient was two years old and still alive at the time of publication (7); CAfter 24h; Time of survival: SB, h, d, m, and y refer, respectively, to stillbirth, hours, days, months, and years; IUGR, intrauterine growth restriction; IDDM, insulin dependent diabetes mellitus; NA-inf…
